# Supplementary material for: Closing the Yield Gap for Cannabis: A Meta-Analysis of Factors Determining Cannabis Yield
Source: Front Plant Sci. 2019 Apr 24;10:495. doi: 10.3389/fpls.2019.00495 (PMC6491815; doi:10.3389/fpls.2019.00495)
Supplement: Supplementary file 1 [file Table_4.DOCX]

Based on the data studied, yield plant-1 can be predicted using the formula:

where *D* is plant density on the statistically standardized scale, L*int* is light intensity (W m-2) and *VSH9* = 1 indicates Silver Haze #9. Yield plant-1 increased with light intensity for varieties other than Silver Haze #9 (*p* = 0.0229); yield per plant was higher for Silver Haze #9 than other varieties at a light intensity of 600 W m-2 (*p* = 0.0009; Figure S1A). Yield per plant decreased at planting densities above 12 plants m-2 (*p* = 0.0065) (Figure S1B).


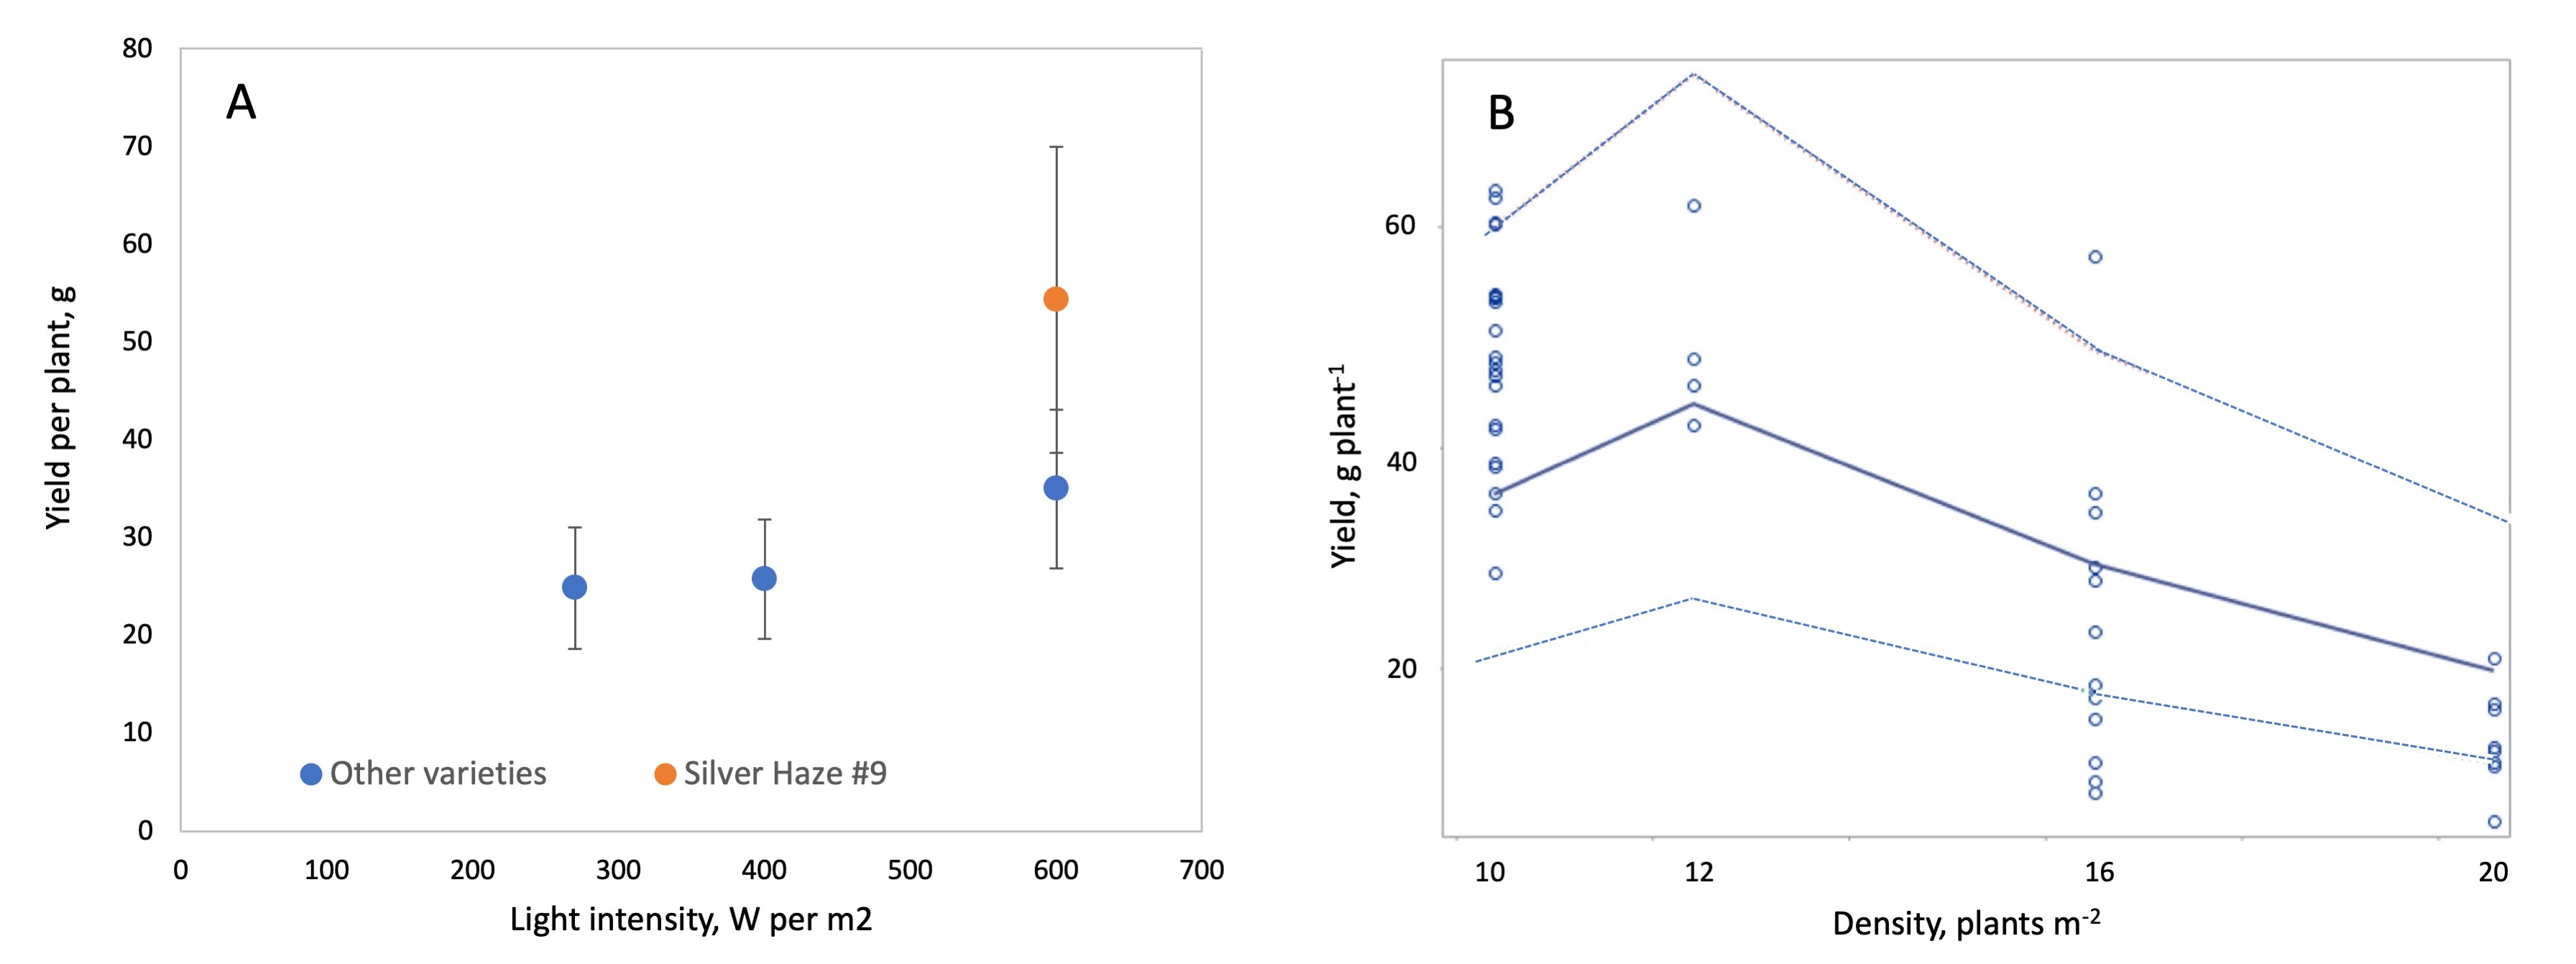


Figure S1.

THC plant-1 can be described according to:

where *Lint* is light intensity on the statistically standardized scale, is the square of the pot size on the statistically standardized scale, *FD* is the duration of the flowering period on the statistically standardized scale, *VBB*= 1 represents Big Bud, *VSS* = 1 represents Super Skunk, *VEP* = 1 represents Early Pearly, and *Ftype* is fertilizer type (where 0 = CannaTerra and 1 = slow release fertilizer). THC plant-1 increased with light intensity and the square of the pot size (*p* = 0.0003 and *p* = 0.0159, respectively) (Figures S2A, B). Increasing the duration of the flowering period resulted in increased THC plant-1, but this effect was weaker for Big Bud and Super Skunk (Figures S2C, D) (*p* = 0.0003 and *p* = 0.0019, respectively). Early Pearly produced lower THC plant-1 compared other varieties when slow release fertilizer was applied (*p* < 0.0001).


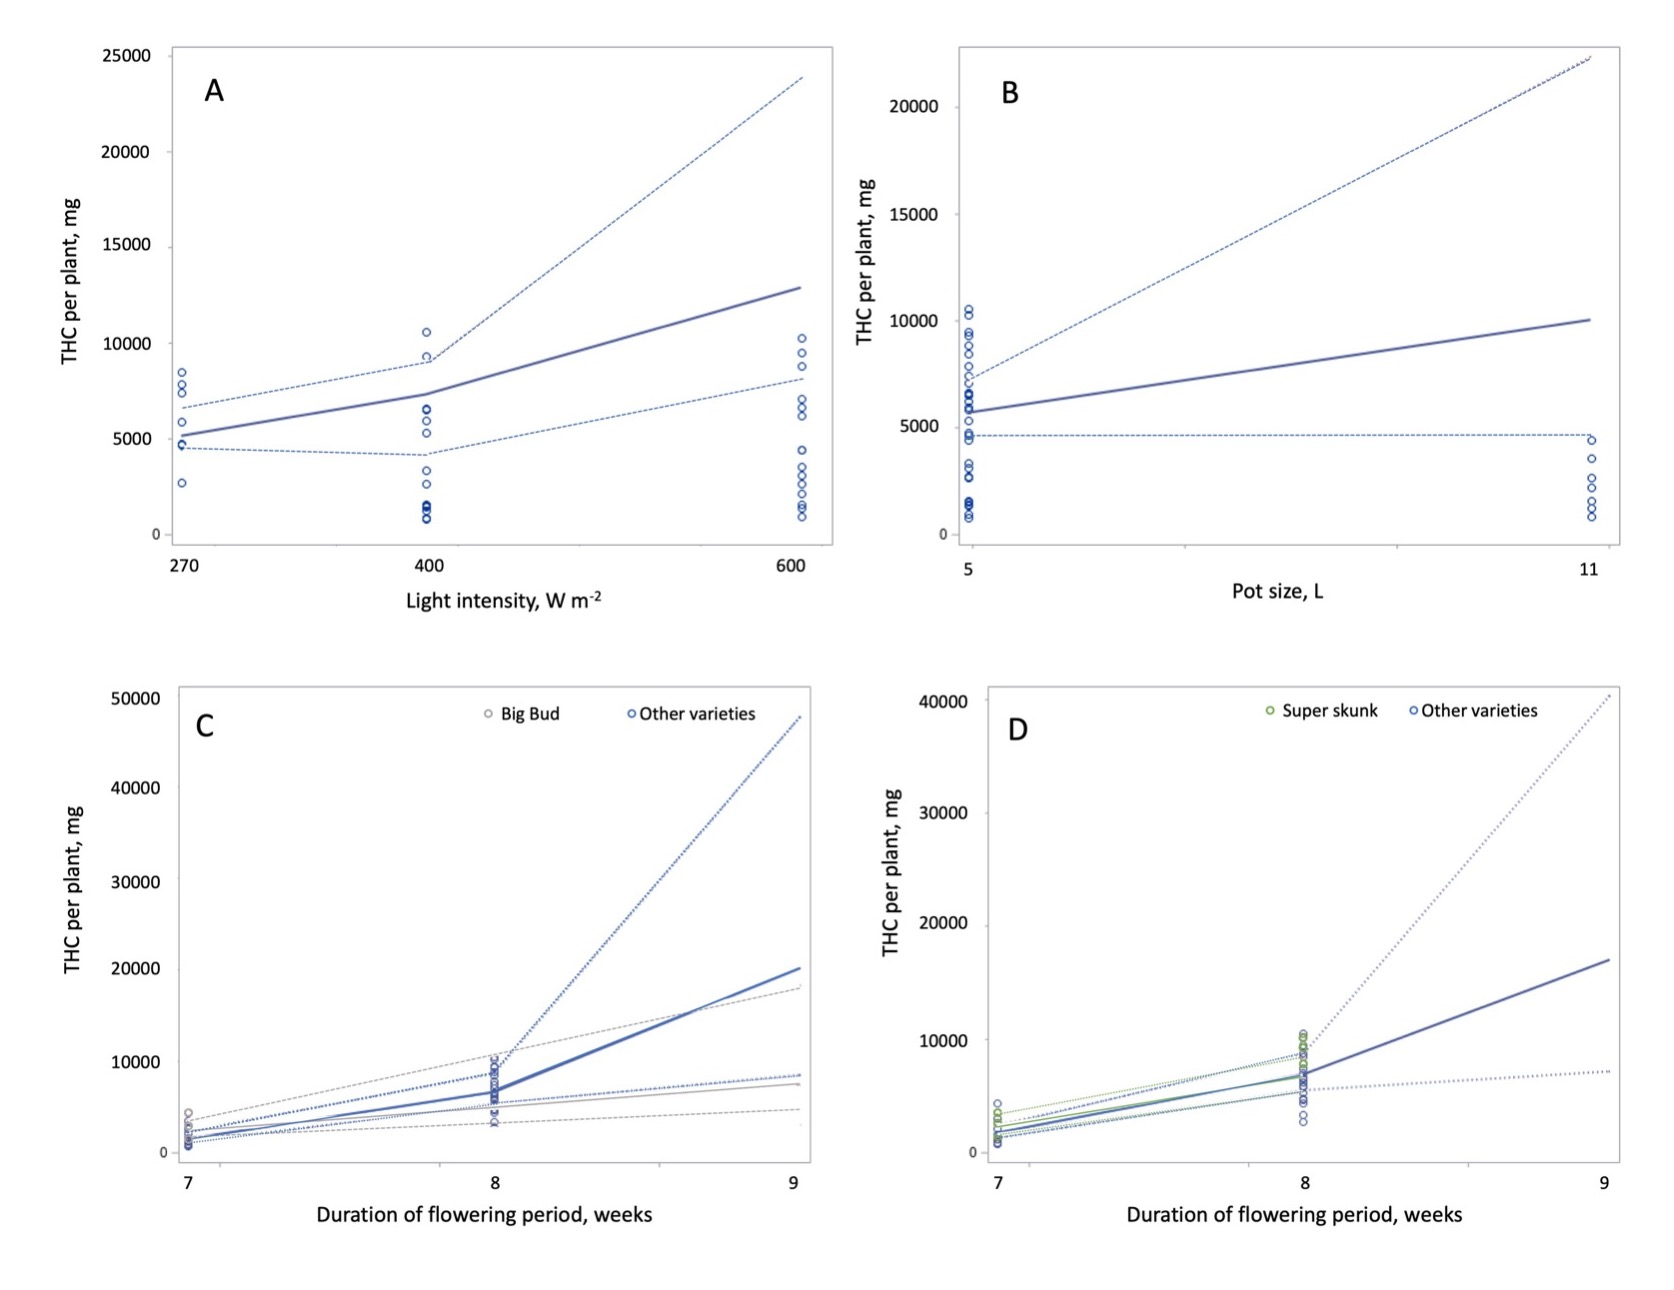
Figure S2.

CBD plant-1 can be described according to:

where *Lint* is light intensity (W m-2) and *Ltype* is light type (where 0 = HPS and 1 = MH). When metal halide lamps with a light intensity of 400 W m-2 were used, CBD per plant was significantly lower than when high pressure sodium lamps with a light intensity of 600 W m-2 were used (*p* = 0. 0220) (Figure S3).


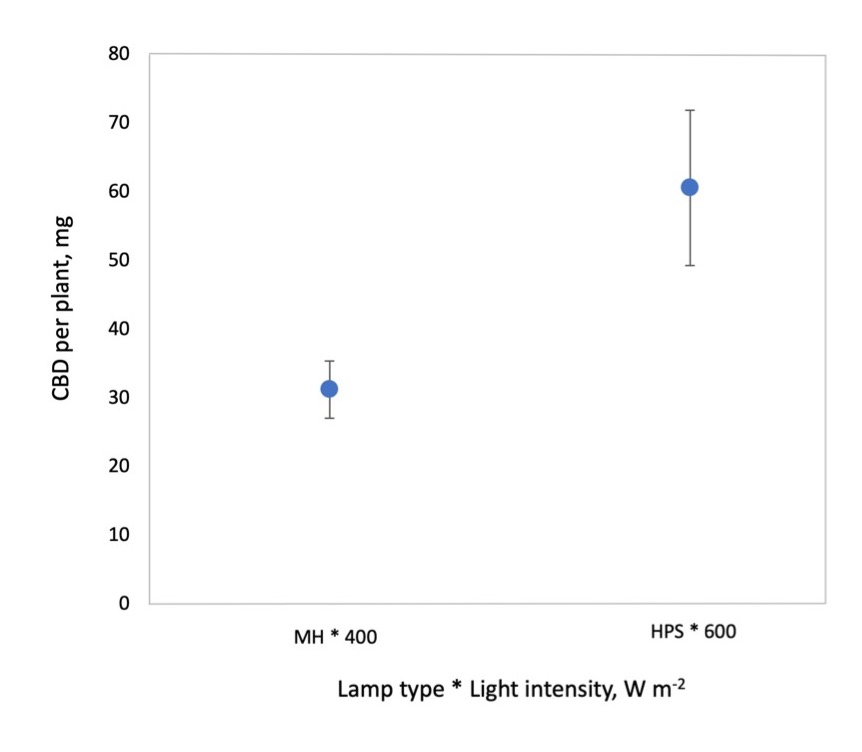


Figure S3.
