# Supplementary material for: Closing the Yield Gap for Cannabis: A Meta-Analysis of Factors Determining Cannabis Yield
Source: Front Plant Sci. 2019 Apr 24;10:495. doi: 10.3389/fpls.2019.00495 (PMC6491815; doi:10.3389/fpls.2019.00495)
Supplement: Table S1 — Projected and actual yield data for commercial cannabis operations in Canada as of April 2018. Actual yields are reported for AB Labs, United Greeneries, MedReleaf, Mettrum, WeedMD and Canopy Growth. Facility numbers corresponds to those shown in Figure 1 of the text. Data were collected from press releases provided by the companies, with links provided in column G. [file Table_1.XLSX]

## Sheet: Sheet1
Facility number	Company	annual production of dry cannabis, kg	square meterage	yield, g/m2/year	notes	Source
1	Agri-Médic ASP Inc.		371.612	NA		http://www.lapresse.ca/actualites/201712/22/01-5148181-cannabis-un-producteur-commercialisera-le-quebec-gold.php
2	THC Biomed Ltd.	400	371.612	1076.39	based on additional 400 kg/year resulting from addition of 4000 sq ft	http://thecse.com/sites/default/files/investorx/THC/1801021212516358.pdf
3	Medical Marijuana Group Corporation	NA	557.418	NA
4	THC Inc.	600	603.87	993.592	estimated 500-700 kg/year	http://thechronicleherald.ca/novascotia/1532301-antigonish-county-man%E2%80%99s-marijuana-dream-coming-true
5	A B Laboratories*	600	613.16	978.538		https://www.newswire.ca/news-releases/invictus-md-to-increase-investment-in-ab-laboratories-ab-laboratories-receives-sales-license-ab-laboratories-ab-ventures-and-acreage-pharms-target-over-26000-kg-capacity-in-2018-668310113.html
6	Vert Cannabis Inc.	NA	650.321	NA	Canopy Growth expansion into Quebec
7	Experion Biotechnologies Inc.	830	771.095	1076.39	growing space in an 8300 sq ft facility; growing area is likely smaller	https://equitygrades.com/tag/vir/
8	GrenEx Pharms Inc.	1000	930	1075.27		http://edmontonjournal.com/business/commercial-real-estate/after-years-of-work-grenex-licensed-as-first-edmonton-cannabis-company
9	Canveda Inc.	1200	1114.84	1076.39		https://www.mykawartha.com/news-story/8019748-marijuana-producers-are-bringing-30-plus-jobs-to-peterborough/
10	Potanicals Green Growers Inc.	3125	1179.87	2648.6		https://globenewswire.com/news-release/2017/08/03/1072373/0/en/Kaiyue-Announces-the-Signing-of-a-Letter-of-Intent-With-Potanicals-Green-Growers-Inc.html
11	Beleave Kannabis Corp.	550	1347.09	408.286		https://investingnews.com/company-profiles/beleave-medical-cannabis-extracts/
12	RedeCan Pharm	NA	1393.55	NA
13	United Greeneries Ltd.*	1000	1486.45	672.745		http://www.marketwired.com/press-release/harvest-one-cannabis-inc-acquires-duncan-facility-property-tsx-venture-hvst-2218983.htm
14	PureSinse Inc.	4000	1672.25	2391.98		https://www.prnewswire.com/news-releases/puresinse-inc-granted-coveted-acmpr-license-from-health-canada-300578349.html
15	Agripharm Corp. (2nd site for Mettrum)		1858.06	NA
16	Abba Medix Corp.	2100	2034.58	1032.16		https://canadahouse.ca/tag/abba-medix/
17	DOJA Cannabis Ltd.	658	2097.75	313.669	projected to increase to 5000 kg/year	https://www.newswire.ca/news-releases/doja-cannabis-company-to-expand-production-capacity-to-over-5000-kilograms-per-year-649227123.html
18	Canada's Island Garden Inc.	800	2229.67	358.797		https://www.agcanada.com/daily/flower-growers-turn-to-weed-ahead-of-legalization
19	We Grow BC Ltd.	NA	2229.67	NA		https://www.thenewswire.com/archives/LaPF8g0m-arev-nutrition-sciences-inc-announces-a-reverse-takeover-transaction-with-we-grow-bc-ltd.html
20	Agrima Botanicals Corp.	NA	2322.57	NA
21	Evergreen Medicinal Supply Inc.	360	2322.57	155	based on 30 kg/month in a 25,000 sq ft facility	https://globenewswire.com/news-release/2017/07/13/1044315/0/en/Evergreen-Medicinal-Supply-commences-cultivation-pursuant-to-ACMPR-license-enters-into-wholesale-supply-agreement-with-Licensed-Producer-and-enters-into-funding-agreement-with-Cann.html
22	Broken Coast Cannabis Ltd.	4500	2415.48	1862.99		https://www.newswire.ca/news-releases/aphria-strengthens-portfolio-with-acquisition-of-leading-west-coast-producer-broken-coast-669350423.html
23	WeedMD*	1200	2415.48	496.796
24	Greenseal Cannabis Company Ltd.	NA	2601.28	NA		http://www.stratfordbeaconherald.com/2017/12/22/cultivation-expected-to-begin-at-greenseal-cannabis-cos-stratford-facility-in-january
25	Green Relief Inc.	2700	2787.09	968.752		http://www.cbc.ca/news/canada/hamilton/news/take-a-tour-of-hamilton-s-first-legal-marijuana-production-plant-1.3544318
26	Zenabis Ltd.	4000	2787.09	1435.19		http://vancouversun.com/business/local-business/embargoed-b-c-cannabis-export-contract; http://www.cbc.ca/news/canada/new-brunswick/zenabis-new-brunswick-recreational-marijuana-supplier-1.4410289
27	Breathing Green Solutions Inc.	2340	3251.61	719.645		https://www.newswire.ca/news-releases/breathing-green-solutions-first-licensed-cannabis-producer-in-nova-scotia-657191733.html; https://globalnews.ca/news/3860662/nova-scotias-first-licensed-cannabis-producer/
28	Prairie Plant Systems Inc.	NA	3251.61	NA
29	AGB	7000	3298.06	2122.46		https://rqbglobal.com/production/
30	atlas growers	5500	3530.31	1557.94		https://globenewswire.com/news-release/2017/07/15/1047205/0/en/Atlas-Growers-Breaks-Ground-on-New-38-000-ft-Cannabis-Production-Facility.html
31	Acreage Pharms Ltd.	5000	3716.12	1345.49		http://invictus-md.com/2018/01/31/invictuss-acreage-pharms-launches-innovative-ambitious-extraction-program-for-cannabis-oils/
32	Aurora Cannabis Enterprises Inc. (Vie)	4000	3716.12	1076.39
33	DelShen Therapeutics Corp.	13000	3716.12	3498.27		https://www.dailymarijuanaobserver.com/single-post/2017/03/01/Introducing-the-39th-ACMPR-Licensed-Producer---DelShen-Therapeutics
34	Tilray	NA	3716.12	NA		https://www.tilray.com/press-/2017/8/17/tilray-announces-second-facility-enabling-5x-increase-in-production-capacity
35	MedReleaf Corp.*	12600	NA	3229.17		https://www.newswire.ca/news-releases/medreleaf-reports-second-quarter-fiscal-2018-results-657176153.html
36	HydRx Farms Ltd.	6000	4180.64	1435.19		http://www.marketwired.com/press-release/hydrx-farms-and-cannscience-innovations-complete-merger-to-form-scientus-pharma-inc-2202685.htm
37	Emerald Health Botanicals Inc.	5000	4645.15	1076.39	modular expansion in 50,000 sq ft blocks	https://www.newswire.ca/news-releases/emerald-provides-corporate-update--lays-out-2017-growth-initiatives-614476323.html
38	Bloomera	2000	5109.66	391.415		http://www.marketwired.com/press-release/ravenquest-announces-national-expansion-with-letter-of-intent-to-purchase-bloomera-2245220.htm
39	Aurora Cannabis Enterprises Inc. (Mountain)	7000	5128.25	1364.99
40	Emblem Cannabis Corp.	20000	5574.18	3587.97		https://globenewswire.com/news-release/2017/05/30/999879/0/en/Emblem-Corp-Enters-into-Agreements-to-Acquire-Land-for-Production-Capacity-Expansion-in-Preparation-for-the-Adult-Recreational-Market.html
41	Mettrum (Bennett North) Ltd.*	6000	5574.18	1076.39		http://www.marketwired.com/press-release/mettrum-sell-non-core-subsidiary-7-million-enters-three-year-product-supply-agreement-tsx-venture-mt-2159776.htm
42	mettrum site 3	NA	5574.18	NA
43	IsoCanMed Inc.	NA	6038.69	NA
44	Whistler Medical Marijuana Corp.	6500	6038.69	1076.39	projected yield for expansion to existing facilities; no data on size, yield @ current facilities	http://www.marketwired.com/press-release/whistler-medical-marijuana-set-to-commence-65000-sq-ft-expansion-2201888.htm
45	Aero Farms Canada	NA	6503.21	NA
46	Aqualitas Inc.	9000	6503.21	1383.93		https://globenewswire.com/news-release/2018/01/23/1299488/0/en/Aqualitas-Inc-Receives-Health-Canada-Cannabis-Cultivation-Licence.html
47	Delta 9 Bio-Tech Inc.	1000	7432.24	134.549	projected to increase to 17,000 kg/year by 20020	https://www.newswire.ca/news-releases/delta-9-cannabis-inc-goes-public-under-symbol-nine-655642713.html
48	RQB total	11000	8361.27	1315.59	expected late 2018	http://www.marketwired.com/press-release/ravenquest-announces-national-expansion-with-letter-of-intent-to-purchase-bloomera-2245220.htm
49	Tweed Grasslands Cannabis Inc.	NA	8361.27	NA
50	CanniMed Ltd.	7000	9011.59	776.777		https://www.cannimedtherapeutics.com/investors/overview/about-cannimed-therapeutics/default.aspx
51	Kolab Project Inc.	25000	9290.3	2690.98		http://www.obj.ca/article/chesterville-looks-pot-recoup-losses-shuttered-nestle-plant
52	Natural Med Company	NA	11148.4	NA
53	Tantalus Labs Ltd.	NA	11148.4	NA
54	United Greeneries Ltd.	8500	12077.4	703.794		http://www.marketwired.com/press-release/harvest-one-cannabis-inc-acquires-duncan-facility-property-tsx-venture-hvst-2218983.htm
55	ABCann	20000	13935.5	1435.19		http://www.abcannglobal.com/assets/ABcannGlobal-CorporatePresentation.pdf
56	Evergreen Medicinal Supply Inc.	30000	13935.5	2152.78		https://globenewswire.com/news-release/2017/07/13/1044315/0/en/Evergreen-Medicinal-Supply-commences-cultivation-pursuant-to-ACMPR-license-enters-into-wholesale-supply-agreement-with-Licensed-Producer-and-enters-into-funding-agreement-with-Cann.html
57	UP Cannabis Inc.	15000	14864.5	1009.12		http://www.marketwired.com/press-release/newstrike-subsidiary-up-cannabis-acquires-facility-capable-adding-12000kg-annual-production-tsx-venture-hip-2225954.htm
58	OrganiGram Inc.	25000	15793.5	1582.93		https://www.organigram.ca/latest/organigram-expanding-operations-hiring-up-to-140-new-employees-will-raise-annual-output-to-25000-kg/
59	Maricann Inc.	22245	20160	1103.43		http://www.marketwired.com/press-release/new-health-canada-licence-allows-maricann-group-inc-increase-cannabis-production-over-2239908.htm
60	WeedMD	21000	20234.3	1037.84		https://www.weedmd.com/weedmd-launches-major-production-expansion-610000-square-foot-state-art-greenhouse/
61	Canopy	10000	23225.8	430.557	greenhouse; have half million sq ft of production space total	https://www.reuters.com/article/us-canopy-growth-cannabis/canadas-top-marijuana-producer-to-double-production-idUSKCN1BI2Y1
62	James E. Wagner Cultivation Ltd.	14600	25548.3	571.466		http://www.cbc.ca/news/canada/kitchener-waterloo/james-e-wagner-expanding-former-lear-plant-kitchener-1.4307831
63	James E. Wagner Cultivation Ltd.	25550	25548.3	1000.07		http://www.cbc.ca/news/canada/kitchener-waterloo/james-e-wagner-expanding-former-lear-plant-kitchener-1.4307831
64	Peace Naturals Project Inc.	40000	29264.4	1366.85		https://www.newswire.ca/news-releases/cronos-breaks-ground-on-worlds-largest-purpose-built-indoor-cannabis-facility-623819663.html
65	Bonify Medical Cannabis	100	29729	3.36372	not yet operational, as of aug 2017; production could grow to 100000 kg/year	http://www.cbc.ca/news/canada/manitoba/bonify-marijuana-manitoba-1.4083557
66	7 acres	52000	31587	1646.25	aim based on 1000 kg/week at peak production	http://www.kincardinenews.com/2017/04/25/kincardine-7-acres-cannabis-greenhouse-now-expecting-to-staff-up-to-300-as-expansion-ramps-up
67	Tweed Farms Inc.	20000	32516	615.081	greenhouse space; expanding to >1000000 sq ft	https://www.cantechletter.com/2017/09/canopy-growth-corps-tweed-expansion-plans-get-thumbs-gmp/
68	Sundial Growers Inc.	120000	55741.8	2152.78		https://www.newswire.ca/news-releases/sundial-joins-cannabis-canada-association-662277573.html
69	canopy growth corp	NA	60386.9	NA	total growing space	https://en.wikipedia.org/wiki/Canopy_Growth_Corporation
70	Natura Naturals Inc.	NA	65032.1	NA
71	Aurora Cannabis Enterprises Inc. (Sky)	100000	74322.4	1345.49		https://www.newswire.ca/news-releases/aurora-receives-cultivation-license-for-pointe-claire-quebec-site-654062833.html
72	Maricann Inc.	95000	87514.6	1085.53		https://www.weednewswire.com/2018/01/24/maricann-group-announces-proposed-acquisition/
73	The Green Organic Dutchman Ltd.	116000	90115.9	1287.23		https://tgod.ca/tgod-announces-closing-of-112m-financing-and-strategic-investment-by-aurora-cannabis-inc/
74	CannTrust Inc.	40000	92903	430.557		https://www.newswire.ca/news-releases/canntrust-announces-receiving-health-canada-approval-to-export-medical-marijuana-internationally-and-the-shipping-of-medical-marijuana-to-australia-656075173.html
75	Emerald Health Botanicals Inc.	75000	102193	733.903		https://www.newswire.ca/news-releases/emerald-health-and-village-farms-announce-strategic-venture-to-leverage-large-scale-greenhouse-infrastructure-and-cannabis-production-expertise-626842621.html
76	Hydropothecary	108000	120774	894.233		http://www.marketwired.com/press-release/hydropothecary-announces-expansion-plans-increase-production-capacity-108000-kilograms-tsx-venture-thcx-2243071.htm
77	Aphria	220000	130064	1691.47		https://www.newswire.ca/news-releases/aphria-secures-additional-120000-kgs-of-expected-annual-cannabis-production-for-january-20191-668293073.html
78	FV Pharma Inc.	200000	353031	566.522		https://globenewswire.com/news-release/2017/12/21/1268664/0/en/Cannabis-Wheaton-Income-Corp-Announces-New-Joint-Venture-for-Development-of-World-s-Largest-Indoor-Cannabis-Facility-with-Licensed-Producer-Partner-FV-Pharma-Inc.html
79	Emerald Health Botanicals Inc.	300000	445934	672.745		https://www.newswire.ca/news-releases/emerald-health-and-village-farms-announce-strategic-venture-to-leverage-large-scale-greenhouse-infrastructure-and-cannabis-production-expertise-626842621.html
-	AgMedica Bioscience Inc.	6000	NA	NA
-	Agro-Biotech Inc.	NA	NA	NA
-	Agro-Greens Natural Products Ltd.	NA	NA	NA
-	Bedrocan Canada Inc.	3000	NA	NA		http://www.canadianbusiness.com/business-news/bedrocan-approved-to-sell-medical-marijuana-produced-at-its-canadian-facility/
-	Bedrocan Canada Inc. (2nd site)	NA	NA	NA
-	Canna Farms Ltd.	NA	NA	NA
-	Indiva Inc.	NA	NA	NA
-	Medical Saints	NA	NA	NA
-	MEDIWANNA	NA	NA	NA
-	Original BC Ltd.	2600	NA	NA		https://www.newswire.ca/news-releases/cronos-breaks-ground-on-worlds-largest-purpose-built-indoor-cannabis-facility-623819663.html
-	Quality Green Inc.	NA	NA	NA
-	Radicle Medical Marijuana Inc.	NA	NA	NA
-	RedeCan Pharm	NA	NA	NA
-	Solace Health Inc.	NA	NA	NA
-	Spectrum Cannabis Canada Ltd.	NA	NA	NA		https://www.newcannabisventures.com/tag/spectrum-cannabis/
-	The Flowr Group (Okanagan) Inc.	NA	NA	NA
-	Tweed Inc.	NA	NA	NA
-	Whistler	NA	NA	NA
-	WILL Cannabis Group	NA	NA	NA
