# Supplementary material for: Closing the Yield Gap for Cannabis: A Meta-Analysis of Factors Determining Cannabis Yield
Source: Front Plant Sci. 2019 Apr 24;10:495. doi: 10.3389/fpls.2019.00495 (PMC6491815; doi:10.3389/fpls.2019.00495)
Supplement: Table S2 — Yield data for cannabis (drug type) from the scientific literature based on growing conditions reported by authors. Units are as indicated in each column title. HPS, high pressure sodium; MH, metal halide; org, organic fertilizer (no further details provided by author); slowrel, slow release fertilizer contained in growing medium; Cap2017, Caplan et al., 2017; Con2017, Conant et al., 2017; Pot2012, Potter and Duncombe, 2012; Pot2014, Potter, 2014; Van2011, Vanhove et al., 2011; Van2012, Vanhove et al., 2012. [file Table_2.xlsx]

## Sheet: Sheet1
variety	plant density per m2, at flowering	CO2, ppm	light intensity, W/m2	light intensity, PAR umol/m2/s	light type	max. temp during growth, C	photoperiod during vegetative growth	photoperiod during flowering, h	duration of vegetative stage, weeks	duration of flowering stage, weeks	pot size, L	fertilizer type	Fertilizer rate (mg N/L)	Inoculation	source	yield per plant, g	yield, g per m2	yield, g/W	THC, %	THC yield per plant, mg	THC yield, mg per m2	CBD, %	CBD yield per plant, mg	CBD yield, mg per m2
OG Kush X Grizzly	6.5	500	-	250	fluorescent	22	18	12	3	6.71	6	org	117	-	cap2017	22.82	3.51077	-	0.233	53.1706	8.18009	-	-	-
OG Kush X Grizzly	6.5	500	-	250	fluorescent	22	18	12	3	6.71	6	org	234	-	cap2017	33.06	5.08615	-	0.291	96.2046	14.8007	-	-	-
OG Kush X Grizzly	6.5	500	-	250	fluorescent	22	18	12	3	6.71	6	org	354.16	-	cap2017	37.65	5.79231	-	0.287	108.055	16.6239	-	-	-
OG Kush X Grizzly	6.5	500	-	250	fluorescent	22	18	12	3	6.71	6	org	468	-	cap2017	37.76	5.80923	-	0.298	112.525	17.3115	-	-	-
OG Kush X Grizzly	6.5	500	-	250	fluorescent	22	18	12	3	6.71	6	org	585	-	cap2017	41.65	6.40769	-	0.307	127.865	19.6716	-	-	-
-	-	-	-	-	HPS	22	-	-	-	-	-	-	-	control	con2017	15.9	-	-	-	-	-	-	-	-
-	-	-	-	-	HPS	22	-	-	-	-	-	-	-	MammothP	con2017	18.5	-	-	-	-	-	-	-	-
early pearly	10	370	270	80	HPS	25	24	12	3	8	5	slowrel	-	-	pot2012	28.8093	288.093	1.06701	9.54	2748.41	27484.1	-	-	-
G1	10	370	270	80	HPS	25	24	12	3	8	5	slowrel	-	-	pot2012	45.7191	457.191	1.6933	10.49	4795.93	47959.3	-	-	-
Hindu Kush	10	370	270	80	HPS	25	24	12	3	8	5	slowrel	-	-	pot2012	38.4124	384.124	1.42268	12.22	4693.99	46939.9	-	-	-
super skunk	10	370	270	80	HPS	25	24	12	3	8	5	slowrel	-	-	pot2012	41.7526	417.526	1.54639	18.89	7887.06	78870.6	-	-	-
Wappa	10	370	270	80	HPS	25	24	12	3	8	5	slowrel	-	-	pot2012	38.6211	386.211	1.43041	19.28	7446.15	74461.5	-	-	-
White berry	10	370	270	80	HPS	25	24	12	3	8	5	slowrel	-	-	pot2012	53.2345	532.345	1.97165	11.04	5877.09	58770.9	-	-	-
white widow	10	370	270	80	HPS	25	24	12	3	8	5	slowrel	-	-	pot2012	47.8067	478.067	1.77062	17.78	8500.03	85000.3	-	-	-
early pearly	10	370	400	120	HPS	25	24	12	3	8	5	slowrel	-	-	pot2012	35.8763	358.763	0.896907	9.43	3383.13	33831.3	-	-	-
G1	10	370	400	120	HPS	25	24	12	3	8	5	slowrel	-	-	pot2012	53.8144	538.144	1.34536	11.07	5957.26	59572.6	-	-	-
Hindu Kush	10	370	400	120	HPS	25	24	12	3	8	5	slowrel	-	-	pot2012	42.0619	420.619	1.05155	12.72	5350.27	53502.7	-	-	-
super skunk	10	370	400	120	HPS	25	24	12	3	8	5	slowrel	-	-	pot2012	48.2474	482.474	1.20619	19.37	9345.53	93455.3	-	-	-
Wappa	10	370	400	120	HPS	25	24	12	3	8	5	slowrel	-	-	pot2012	34.3299	343.299	0.858247	19.05	6539.85	65398.5	-	-	-
White berry	10	370	400	120	HPS	25	24	12	3	8	5	slowrel	-	-	pot2012	63.4021	634.021	1.58505	10.45	6625.52	66255.2	-	-	-
white widow	10	370	400	120	HPS	25	24	12	3	8	5	slowrel	-	-	pot2012	60.3093	603.093	1.50773	17.53	10572.2	105722	-	-	-
early pearly	10	370	600	180	HPS	25	24	12	3	8	5	slowrel	-	-	pot2012	46.6154	466.154	0.776923	9.54	4447.11	44471.1	-	-	-
G1	10	370	600	180	HPS	25	24	12	3	8	5	slowrel	-	-	pot2012	62.7692	627.692	1.04615	11.36	7130.58	71305.8	-	-	-
Hindu Kush	10	370	600	180	HPS	25	24	12	3	8	5	slowrel	-	-	pot2012	47.0769	470.769	0.784615	13.26	6242.4	62424	-	-	-
super skunk	10	370	600	180	HPS	25	24	12	3	8	5	slowrel	-	-	pot2012	54	540	0.9	19.08	10303.2	103032	-	-	-
Wappa	10	370	600	180	HPS	25	24	12	3	8	5	slowrel	-	-	pot2012	53.5385	535.385	0.892308	17.77	9513.78	95137.8	-	-	-
White berry	10	370	600	180	HPS	25	24	12	3	8	5	slowrel	-	-	pot2012	60.4615	604.615	1.00769	11.02	6662.86	66628.6	-	-	-
white widow	10	370	600	180	HPS	25	24	12	3	8	5	slowrel	-	-	pot2012	50.7692	507.692	0.846154	17.43	8849.08	88490.8	-	-	-
sativex	-	-	-	-	-	-	-	12	-	-	-	-	-	-	pot2014	40.91	-	-	13.423	5491.35	-	-	-	-
big bud	16	-	400	-	MH	30	18	12	4	7	5	CannaTerra	-	-	van2011	9.91	142.51	0.356275	15.3	1516.23	21804	0.3	29.73	427.53
big bud	20	-	400	-	MH	30	18	12	4	7	5	CannaTerra	-	-	van2011	12.61	252.1	0.63025	12.5	1576.25	31512.5	0.3	37.83	756.3
nlx	20	-	400	-	MH	30	18	12	4	7	5	CannaTerra	-	-	van2011	6.24	124.88	0.3122	13.3	829.92	16609	0.2	12.48	249.76
nlx	16	-	400	-	MH	30	18	12	4	7	11	CannaTerra	-	-	van2011	11.63	186.15	0.465375	10.9	1267.67	20290.3	0.2	23.26	372.3
super skunk	20	-	400	-	MH	30	18	12	4	7	5	CannaTerra	-	-	van2011	11.25	225.08	0.5627	12.8	1440	28810.2	0.3	33.75	675.24
super skunk	16	-	400	-	MH	30	18	12	4	7	11	CannaTerra	-	-	van2011	18.58	338.54	0.84635	14.3	2656.94	48411.2	0.3	55.74	1015.62
white widow	16	-	400	-	MH	30	18	12	4	7	11	CannaTerra	-	-	van2011	8.91	142.52	0.3563	9.7	864.27	13824.4	0.2	17.82	285.04
white widow	20	-	400	-	MH	30	18	12	4	7	5	CannaTerra	-	-	van2011	13.01	260.11	0.650275	11.7	1522.17	30432.9	0.3	39.03	780.33
big bud	16	-	600	-	HPS	30	18	12	4	7	11	CannaTerra	-	-	van2011	28	447.97	0.746617	15.9	4452	71227.2	0.3	84	1343.91
big bud	20	-	600	-	HPS	30	18	12	4	7	5	CannaTerra	-	-	van2011	21.06	483.33	0.80555	14.8	3116.88	71532.8	0.4	84.24	1933.32
nlx	16	-	600	-	HPS	30	18	12	4	7	11	CannaTerra	-	-	van2011	17.42	278.72	0.464533	12.6	2194.92	35118.7	0.3	52.26	836.16
nlx	20	-	600	-	HPS	30	18	12	4	7	5	CannaTerra	-	-	van2011	16.83	357.55	0.595917	8.3	1396.89	29676.7	0.4	67.32	1430.2
super skunk	20	-	600	-	HPS	30	18	12	4	7	5	CannaTerra	-	-	van2011	16.42	375.98	0.626633	16.3	2676.46	61284.7	0.3	49.26	1127.94
super skunk	16	-	600	-	HPS	30	18	12	4	7	11	CannaTerra	-	-	van2011	23.41	443.87	0.739783	15.2	3558.32	67468.2	0.4	93.64	1775.48
white widow	20	-	600	-	HPS	30	18	12	4	7	5	CannaTerra	-	-	van2011	11.54	230.8	0.384667	8.5	980.9	19618	0.2	23.08	461.6
white widow	16	-	600	-	HPS	30	18	12	4	7	11	CannaTerra	-	-	van2011	15.49	268.29	0.44715	10.4	1610.96	27902.2	0.2	30.98	536.58
big bud	16	-	600	-	HPS	25	18	12	2	9	11	CannaTerra	-	-	van2012	29.32	469.09	0.781817	-	-	-	-	-	-
big bud	12	-	600	-	HPS	25	18	12	2	9	11	CannaTerra	-	-	van2012	48.14	577.69	0.962817	-	-	-	-	-	-
silver haze #9	12	-	600	-	HPS	25	18	12	2	9	11	CannaTerra	-	-	van2012	61.96	743.47	1.23912	-	-	-	-	-	-
silver haze #9	16	-	600	-	HPS	25	18	12	2	9	11	CannaTerra	-	-	van2012	57.31	916.95	1.52825	-	-	-	-	-	-
skunk #1	16	-	600	-	HPS	25	18	12	2	9	11	CannaTerra	-	-	van2012	35.87	573.83	0.956383	-	-	-	-	-	-
skunk #1	12	-	600	-	HPS	25	18	12	2	9	11	CannaTerra	-	-	van2012	42.11	625.35	1.04225	-	-	-	-	-	-
x	16	-	600	-	HPS	25	18	12	2	9	11	CannaTerra	-	-	van2012	34.26	548.15	0.913583	-	-	-	-	-	-
x	12	-	600	-	HPS	25	18	12	2	9	11	CannaTerra	-	-	van2012	45.78	549.33	0.91555	-	-	-	-	-	-
