# Supplementary material for: Closing the Yield Gap for Cannabis: A Meta-Analysis of Factors Determining Cannabis Yield
Source: Front Plant Sci. 2019 Apr 24;10:495. doi: 10.3389/fpls.2019.00495 (PMC6491815; doi:10.3389/fpls.2019.00495)
Supplement: Table S3 — Cannabis yield data included in the statistical analysis. Data for Caplan et al. (2017), Conant et al. (2017), and Potter and Duncombe (2012) were excluded from the meta-analysis due to a high degree of missing information about growing conditions. Units are as indicated in each column title. HPS, high pressure sodium; MH, metal halide; slowrel, slow-release fertilizer contained in growing medium; Pot2012, Potter and Duncombe, 2012; Van2011, Vanhove et al., 2011; Van2012, Vanhove et al., 2012. [file Table_3.xlsx]

## Sheet: Sheet1
Variety	plant density per m2, at flowering	light intensity, W/m2	Light Type	max. temp during growth, C	photoperiod during vegetative growth	duration of vegetative stage, weeks	duration of flowering stage, weeks	pot size, L	fertilizer type	Source	yield per plant, g	yield, g per m2	yield, g/W	THC, %	THC yield per plant, mg	THC yield, mg per m2	CBD, %	CBD yield per plant, mg	CBD yield, mg per m2
bigbud	16	400	MH	30	18	4	7	5	CannaTer	van2011	9.91	142.51	0.35628	15.3	1516.23	21804	0.3	29.73	427.53
bigbud	20	400	MH	30	18	4	7	5	CannaTer	van2011	12.61	252.1	0.63025	12.5	1576.25	31512.5	0.3	37.83	756.3
bigbud	16	600	HPS	30	18	4	7	11	CannaTer	van2011	28	447.97	0.74662	15.9	4452	71227.2	0.3	84	1343.91
bigbud	20	600	HPS	30	18	4	7	5	CannaTer	van2011	21.06	483.33	0.80555	14.8	3116.88	71532.8	0.4	84.24	1933.32
bigbud	16	600	HPS	25	18	2	9	11	CannaTer	van2012	29.32	469.09	0.78182	.	.	.	.	.	.
bigbud	12	600	HPS	25	18	2	9	11	CannaTer	van2012	48.14	577.69	0.96282	.	.	.	.	.	.
earlyp	10	270	HPS	25	24	3	8	5	slowrel	pot2012	28.81	288.093	1.06701	9.54	2748.41	27484	.	.	.
earlyp	10	400	HPS	25	24	3	8	5	slowrel	pot2012	35.88	358.763	0.89691	9.43	3383.13	33831.3	.	.	.
earlyp	10	600	HPS	25	24	3	8	5	slowrel	pot2012	46.62	466.154	0.77692	9.54	4447.11	44471.1	.	.	.
G1	10	270	HPS	25	24	3	8	5	slowrel	pot2012	45.72	457.191	1.6933	10.49	4795.93	47959.3	.	.	.
G1	10	400	HPS	25	24	3	8	5	slowrel	pot2012	53.81	538.144	1.34536	11.07	5957.26	59572.6	.	.	.
G1	10	600	HPS	25	24	3	8	5	slowrel	pot2012	62.77	627.692	1.04615	11.36	7130.58	71305.9	.	.	.
HinduK	10	270	HPS	25	24	3	8	5	slowrel	pot2012	38.41	384.124	1.42268	12.22	4693.99	46939.9	.	.	.
HinduK	10	400	HPS	25	24	3	8	5	slowrel	pot2012	42.06	420.619	1.05155	12.72	5350.27	53502.7	.	.	.
HinduK	10	600	HPS	25	24	3	8	5	slowrel	pot2012	47.08	470.769	0.78462	13.26	6242.4	62424	.	.	.
nlx	20	400	MH	30		4	7	5	CannaTer	van2011	6.24	124.88	0.3122	13.3	829.92	16609	0.2	12.48	249.76
nlx	16	400	MH	30	18	4	7	11	CannaTer	van2011	11.63	186.15	0.46538	10.9	1267.67	20290.3	0.2	23.26	372.3
nlx	16	600	HPS	30	18	4	7	11	CannaTer	van2011	17.42	278.72	0.46453	12.6	2194.92	35118.7	0.3	52.26	836.16
nlx	20	600	HPS	30	18	4	7	5	CannaTer	van2011	16.83	357.55	0.59592	8.3	1396.89	29676.7	0.4	67.32	1430.2
SH9	12	600	HPS	25	18	2	9	11	CannaTer	van2012	61.96	743.47	1.23912	.	.	.	.	.	.
SH9	16	600	HPS	25	18	2	9	11	CannaTer	van2012	57.31	916.95	1.52825	.	.	.	.	.	.
skunk1	16	600	HPS	25	18	2	9	11	CannaTer	van2012	35.87	573.83	0.95638	.	.	.	.	.	.
skunk1	12	600	HPS	25	18	2	9	11	CannaTer	van2012	42.11	625.35	1.04225	.	.	.	.	.	.
supersku	10	270	HPS	25	24	3	8	5	slowrel	pot2012	41.75	417.526	1.54639	18.89	7887.06	78870.6	.	.	.
supersku	10	400	HPS	25	24	3	8	5	slowrel	pot2012	48.25	482.474	1.20619	19.37	9345.53	93455.3	.	.	.
supersku	10	600	HPS	25	24	3	8	5	slowrel	pot2012	54	540	0.9	19.08	10303.2	103032	.	.	.
supersku	20	400	MH	30	18	4	7	5	CannaTer	van2011	11.25	225.08	0.5627	12.8	1440	28810.2	0.3	33.75	675.24
supersku	16	400	MH	30	18	4	7	11	CannaTer	van2011	18.58	338.54	0.84635	14.3	2656.94	48411.2	0.3	55.74	1015.62
supersku	20	600	HPS	30	18	4	7	5	CannaTer	van2011	16.42	375.98	0.62663	16.3	2676.46	61284.7	0.3	49.26	1127.94
supersku	16	600	HPS	30	18	4	7	11	CannaTer	van2011	23.41	443.87	0.73978	15.2	3558.32	67468.2	0.4	93.64	1775.48
Wappa	10	270	HPS	25	24	3	8	5	slowrel	pot2012	38.62	386.211	1.43041	19.28	7446.15	74461.6	.	.	.
Wappa	10	400	HPS	25	24	3	8	5	slowrel	pot2012	34.33	343.299	0.85825	19.05	6539.85	65398.4	.	.	.
Wappa	10	600	HPS	25	24	3	8	5	slowrel	pot2012	53.54	535.385	0.89231	17.77	9513.78	95137.9	.	.	.
whiteber	10	270	HPS	25	24	3	8	5	slowrel	pot2012	53.23	532.345	1.97165	11.04	5877.09	58770.9	.	.	.
whiteber	10	400	HPS	25	24	3	8	5	slowrel	pot2012	63.4	634.021	1.58505	10.45	6625.52	66255.1	.	.	.
whiteber	10	600	HPS	25	24	3	8	5	slowrel	pot2012	60.46	604.615	1.00769	11.02	6662.86	66628.6	.	.	.
whitewid	10	270	HPS	25	24	3	8	5	slowrel	pot2012	47.81	478.067	1.77062	17.78	8500.03	85000.3	.	.	.
whitewid	10	400	HPS	25	24	3	8	5	slowrel	pot2012	60.31	603.093	1.50773	17.53	10572.2	105722	.	.	.
whitewid	10	600	HPS	25	24	3	8	5	slowrel	pot2012	50.77	507.692	0.84615	17.43	8849.08	88490.8	.	.	.
whitewid	16	400	MH	30	18	4	7	11	CannaTer	van2011	8.91	142.52	0.3563	9.7	864.27	13824.4	0.2	17.82	285.04
whitewid	20	400	MH	30	18	4	7	5	CannaTer	van2011	13.01	260.11	0.65028	11.7	1522.17	30432.9	0.3	39.03	780.33
whitewid	20	600	HPS	30	18	4	7	5	CannaTer	van2011	11.54	230.8	0.38467	8.5	980.9	19618	0.2	23.08	461.6
whitewid	16	600	HPS	30	18	4	7	11	CannaTer	van2011	15.49	268.29	0.44715	10.4	1610.96	27902.2	0.2	30.98	536.58
unknownx	16	600	HPS	25	18	2	9	11	CannaTer	van2012	34.26	548.15	0.91358	.	.	.	.	.	.
unknownx	12	600	HPS	25	18	2	9	11	CannaTer	van2012	45.78	549.33	0.91555	.	.	.	.	.	.
